# Supplementary material for: Antarctic sea ice regime shift associated with decreasing zonal symmetry in the Southern Annular Mode
Source: Copernicus journal article supplement (doi:10.5194/tc-17-701-2023), 2023-02-13
Supplement: Supplementary file 1 [file tc-17-701-2023-supplement.pdf]

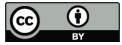

*Supplement of*

## **Antarctic sea ice regime shift associated with decreasing zonal symmetry in the Southern Annular Mode**

**Serena Schroeter et al.**

*Correspondence to:* Serena Schroeter ([serena.schroeter@csiro.au](mailto:serena.schroeter@csiro.au))

The copyright of individual parts of the supplement might differ from the article licence.

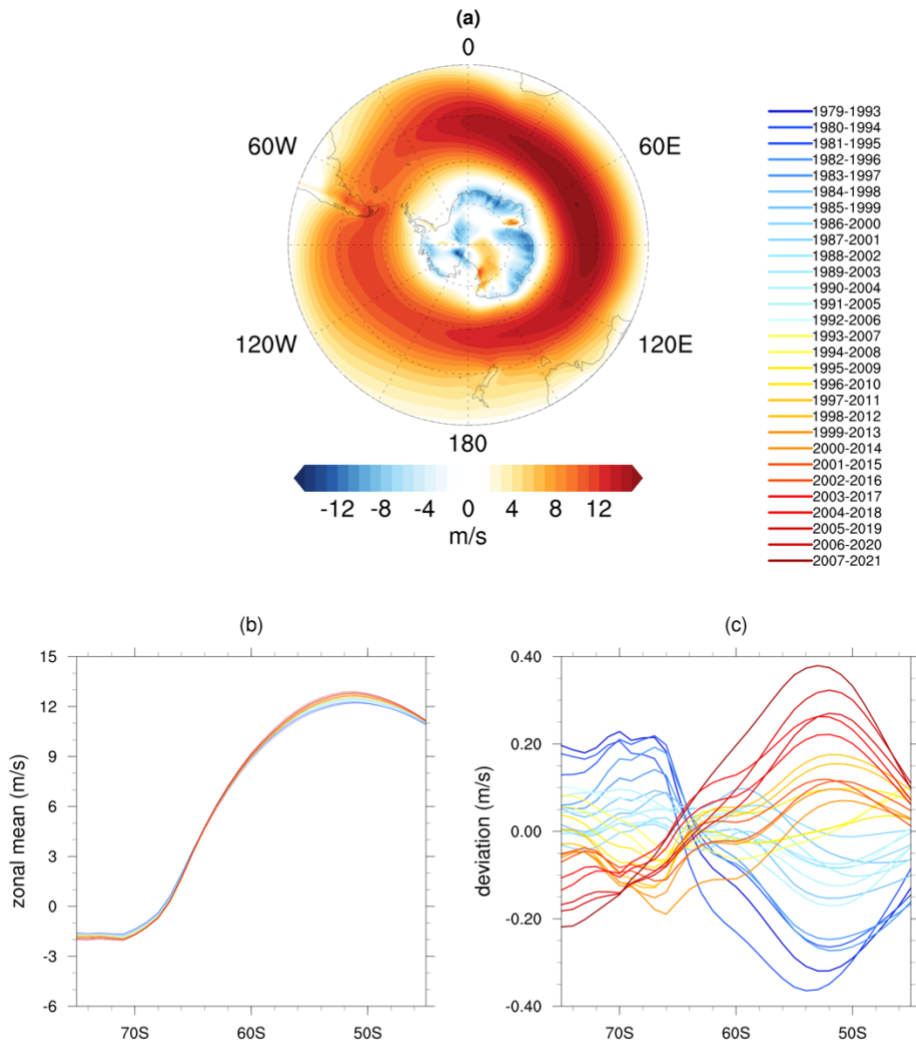

**Figure S1: Annual average 850 hPa zonal mean winds (polar jet) for (a) 1979-2021; (b) 15-year samples; and (c) deviation of each 15-year sample from the 1979-2021 mean.**
